# Supplementary material
Source: PubMed Central journal article supplement (PMC8519277)
Supplement: iai.00215-21-s0001.pdf [file iai.00215-21-s0001.pdf]

**SUPPLEMENTAL FIGURES**

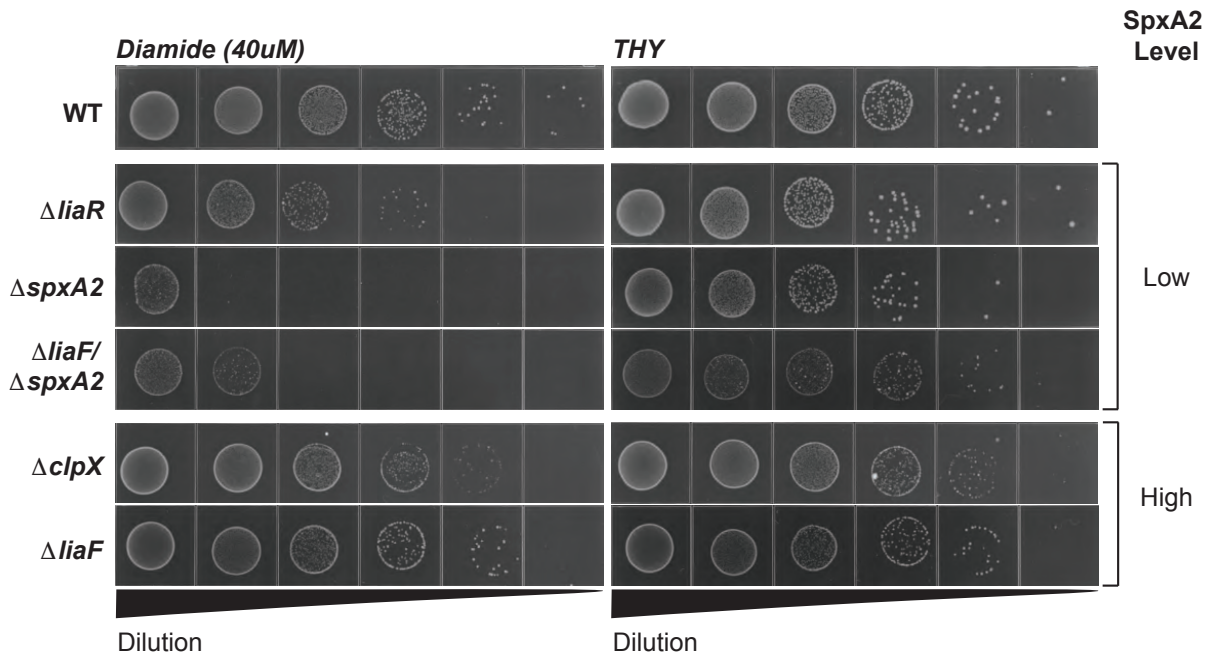

**Figure S1.** *In vitro* diamide sensitivity correlates with predicted SpxA2 protein levels in isogenic mutant strains. Indicated strains were grown in THY to mid-exponential phase ( $OD_{600} \sim 0.5$ ) followed by 10-fold serial dilutions. Dilutions (10  $\mu$ l) were spotted on THY agar with or without diamide (40  $\mu$ M) and incubated at 37°C + 5%  $CO_2$  for ~18 hours. Shown are a single replicate of assays performed in biological triplicate. Predicted SpxA2 levels are indicated (low/high).
