# Supplementary material
Source: PubMed Central journal article supplement (PMC8519277)
Supplement: iai.00215-21-s0002.pdf [file iai.00215-21-s0002.pdf]

## SUPPLEMENTAL TABLES

**Table S1.** Antimicrobial susceptibility testing of wild-type and isogenic deletion strains.

| Strain         | PEN <sup>a</sup>   | VAN  | PMB | DAP   | BAC   | TET  | ERY  |
|----------------|--------------------|------|-----|-------|-------|------|------|
| MGAS10870 (WT) | 0.004 <sup>b</sup> | 0.25 | 24  | 0.094 | 0.25  | 0.50 | 0.25 |
| $\Delta liaR$  | 0.004              | 0.25 | 16  | 0.094 | 0.125 | 0.50 | 0.25 |
| $\Delta liaF$  | 0.004              | 0.50 | 16  | 0.094 | 0.38  | 0.38 | 0.19 |

<sup>a</sup> Abbreviations: bacitracin (BAC), daptomycin (DAP), erythromycin (ERY), penicillin (PEN), polymyxin B (PMB), tetracycline (TET), vancomycin (VAN).

<sup>b</sup> Values are micrograms per milliliter ( $\mu\text{g}/\text{mL}$ ) and determined using E-test according to the protocol for beta-hemolytic streptococci and Clinical Laboratory Standards Institute (CLSI) (1). Values are from a single replicate but all samples were performed in at least biological duplicate with <2-fold difference in minimal inhibitory concentration.

**Table S2.** Differential gene expression of isogenic deletion mutants derived from RNA-sequencing.

| Locus tag <sup>a</sup> | Gene            | Predicted Protein <sup>b</sup>                                               | Log <sub>2</sub><br>ΔLiaF/WT <sup>c</sup> | Log <sub>2</sub><br>ΔLiaR/WT <sup>c</sup> |
|------------------------|-----------------|------------------------------------------------------------------------------|-------------------------------------------|-------------------------------------------|
| 10870_p61              | <i>speC</i>     | Streptococcal pyrogenic exotoxin, C                                          | -1.74                                     | 1.06                                      |
| spyM18_0779            | <i>mf2</i>      | Mitogenic factor 2                                                           | -1.66                                     | 0.94                                      |
| SpyM3_0010             | <i>mesJ</i>     | cell-cycle protein                                                           | 1.62                                      |                                           |
| SpyM3_0011             | <i>hpt</i>      | hypoxanthine-guanine phosphoribosyltransferase                               | 1.74                                      |                                           |
| SpyM3_0012             | <i>ftsH</i>     | cell division protein                                                        | 1.85                                      |                                           |
| SpyM3_0016             | <i>recO</i>     | DNA repair protein RecO                                                      | 0.67                                      |                                           |
| SpyM3_0019             | <i>purC</i>     | phosphoribosylaminoimidazole-succinocarboxamide synthase                     | -1.24                                     | 0.80                                      |
| SpyM3_0020             | <i>purL</i>     | phosphoribosylformylglycinamide synthase II                                  | -1.24                                     | 0.95                                      |
| SpyM3_0021             | <i>purF</i>     | amidophosphoribosyltransferase                                               | -1.18                                     | 0.84                                      |
| SpyM3_0022             | <i>purM</i>     | phosphoribosylaminoimidazole synthetase                                      | -1.30                                     | 0.75                                      |
| SpyM3_0023             | <i>purN</i>     | phosphoribosylglycinamide formyltransferase bifunctional                     | -1.07                                     | 1.13                                      |
| SpyM3_0024             | <i>purH</i>     | phosphoribosylaminoimidazolecarboxamide formyltransferase/IMP cyclohydrolase | -1.06                                     | 1.07                                      |
| SpyM3_0026             | <i>purD</i>     | phosphoribosylamine--glycine ligase                                          | -1.83                                     | 0.89                                      |
| SpyM3_0027             | <i>purE</i>     | phosphoribosylaminoimidazole carboxylase catalytic subunit                   | -1.79                                     | 0.90                                      |
| SpyM3_0028             | <i>purK</i>     | phosphoribosylaminoimidazole carboxylase ATPase subunit                      | -1.68                                     | 0.96                                      |
| SpyM3_0029             |                 | hypothetical protein                                                         | -0.90                                     |                                           |
| SpyM3_0030             | <i>purB</i>     | adenylosuccinate lyase                                                       | -0.63                                     |                                           |
| SpyM3_0031             |                 | hypothetical protein                                                         | -0.89                                     |                                           |
| SpyM3_0036             | <i>adh2</i>     | bifunctional acetaldehyde-CoA/alcohol dehydrogenase                          | 1.41                                      | 0.78                                      |
| SpyM3_0037             | <i>adh1</i>     | alcohol dehydrogenase                                                        | 0.84                                      |                                           |
| SpyM3_0077             |                 | DNA binding protein                                                          | -1.80                                     |                                           |
| SpyM3_0098             | <i>cbp/ap-1</i> | collagen binding protein; pilus accessory protein-1                          | -1.02                                     | 2.14                                      |
| SpyM3_0099             | <i>srtA1</i>    | Pilus, sortase A1                                                            | -0.90                                     | 2.02                                      |
| SpyM3_0100             | <i>tee3/bp</i>  | Pilus, backbone protein (tee)                                                | -0.95                                     | 2.03                                      |
| SpyM3_0101             | <i>srtA2</i>    | Pilus, sortase A2                                                            | -0.92                                     | 1.71                                      |
| SpyM3_0102             | <i>ap-2</i>     | Pilus, accessory protein-2                                                   | -0.69                                     | 1.61                                      |
| SpyM3_0103             | <i>msmR</i>     | multiple sugar metabolism regulator                                          | -0.83                                     |                                           |
| SpyM3_0105             |                 | hypothetical protein                                                         | 1.98                                      | -1.98                                     |
| SpyM3_0112             |                 | hypothetical protein                                                         | 0.87                                      |                                           |
| SpyM3_0113             |                 | regulatory protein                                                           | 0.97                                      |                                           |
| SpyM3_0118             | <i>ntpC</i>     | V-type Na <sup>+</sup> -ATPase subunit C                                     | 0.65                                      |                                           |
| SpyM3_0123             |                 | toxic anion resistance protein                                               | 0.64                                      |                                           |
| SpyM3_0125             | <i>purA</i>     | adenylosuccinate synthetase                                                  | 0.77                                      |                                           |

|            |               |                                                           |       |       |
|------------|---------------|-----------------------------------------------------------|-------|-------|
| SpyM3_0128 | <i>nga</i>    | NAD glycohydrolase                                        |       | -1.35 |
| SpyM3_0129 | <i>ifs</i>    | hypothetical protein                                      |       | -1.40 |
| SpyM3_0130 | <i>slo</i>    | streptolysin O                                            |       | -1.40 |
| SpyM3_0131 |               | hypothetical protein                                      | 1.76  | -3.12 |
| SpyM3_0132 |               | hypothetical protein                                      | 2.28  | -4.21 |
| SpyM3_0133 | <i>metB</i>   | cystathionine beta-lyase                                  | -1.03 | 2.08  |
| SpyM3_0141 |               | transcriptional regulator                                 | -0.61 |       |
| SpyM3_0143 | <i>opuAA</i>  | glycine betaine/proline ABC transporter                   | -0.89 |       |
| SpyM3_0144 | <i>opuABC</i> | glycine-betaine binding permease protein                  | -0.74 |       |
| SpyM3_0145 | <i>polA.1</i> | DNA polymerase I                                          | 0.59  |       |
| SpyM3_0150 |               | hypothetical protein                                      | -0.92 |       |
| SpyM3_0151 |               | biotin synthase                                           | -0.84 |       |
| SpyM3_0160 | <i>hasC.2</i> | UDP-glucose pyrophosphorylase                             | 0.64  |       |
| SpyM3_0161 | <i>gpsA</i>   | NAD(P)H-dependent glycerol-3-phosphate dehydrogenase      | 0.63  |       |
| SpyM3_0162 |               | hypothetical protein                                      | -1.25 |       |
| SpyM3_0163 |               | ABC transporter ATP-binding/permease protein              | -0.95 |       |
| SpyM3_0164 |               | ABC transporter ATP-binding/membrane spanning protein     | -0.88 |       |
| SpyM3_0232 | <i>atmA</i>   | ABC transporter substrate-binding protein                 | -0.73 |       |
| SpyM3_0236 | <i>braB</i>   | branched-chain amino acid transport protein               | -1.22 | 0.68  |
| SpyM3_0237 |               | serine/threonine transporter SstT                         | -1.24 |       |
| SpyM3_0243 |               | hypothetical protein                                      |       | -0.62 |
| SpyM3_0256 |               | OxaA-like protein precursor                               | 1.63  |       |
| SpyM3_0259 |               | hypothetical protein                                      | -0.66 |       |
| SpyM3_0272 |               | hypothetical protein                                      | -0.88 |       |
| SpyM3_0280 | <i>fhuG.1</i> | ferrichrome ABC transporter (permease)                    |       | 0.64  |
| SpyM3_0281 | <i>fhuB</i>   | ferrichrome ABC transporter (permease)                    |       | 0.59  |
| SpyM3_0282 | <i>fhuD.1</i> | ferrichrome ABC transporter (ferrichrome-binding protein) |       | 0.59  |
| SpyM3_0283 | <i>fhuC.1</i> | ferrichrome ABC transporter ATP-binding protein           |       | 0.65  |
| SpyM3_0285 |               | polysaccharide biosynthesis protein                       | 0.69  |       |
| SpyM3_0298 | <i>prtS</i>   | IL-8 protease (PrtS/SpyCEP)                               | 1.63  | -4.17 |
| SpyM3_0299 |               | hypothetical protein                                      | -0.69 | 0.72  |
| SpyM3_0304 |               | hypothetical protein                                      |       | -1.32 |
| SpyM3_0305 |               | hypothetical protein                                      | 0.79  | -2.32 |
| SpyM3_0306 |               | hypothetical protein                                      | 0.59  |       |
| SpyM3_0307 |               | hypothetical protein                                      |       | -1.24 |
| SpyM3_0331 |               | hypothetical protein                                      |       | -0.76 |
| SpyM3_0333 | <i>phoH</i>   | phosphate starvation-induced protein                      | 0.65  |       |
| SpyM3_0334 |               | hypothetical protein                                      | 0.83  |       |
| SpyM3_0346 | <i>mutR</i>   | positive transcriptional regulator                        |       | -0.77 |
| SpyM3_0349 |               | ATPase                                                    | 0.59  |       |

|            |               |                                                                                         |       |       |
|------------|---------------|-----------------------------------------------------------------------------------------|-------|-------|
| SpyM3_0359 | <i>gloA</i>   | lactoylglutathione lyase                                                                | 0.76  | -0.59 |
| SpyM3_0360 |               | NAD(P)H-dependent quinone reductase                                                     | 0.71  | -0.64 |
| SpyM3_0361 | <i>pepQ</i>   | Xaa-Pro dipeptidase                                                                     | 0.77  | -0.63 |
| SpyM3_0363 |               | sugar transferase                                                                       | 2.53  |       |
| SpyM3_0364 |               | 1,2-diacylglycerol 3-glucosyltransferase                                                | 2.68  |       |
| SpyM3_0375 | <i>rnc</i>    | ribonuclease III<br>chromosome condensation and segregation<br>SMC                      | 0.74  |       |
| SpyM3_0376 | <i>smc</i>    | protein                                                                                 | 0.73  |       |
| SpyM3_0377 |               | positive transcriptional regulator                                                      | -0.74 |       |
| SpyM3_0393 |               | hypothetical protein                                                                    | 0.60  |       |
| SpyM3_0394 |               | hypothetical protein                                                                    | 0.69  |       |
| SpyM3_0402 |               | drug resistance protein (transporter)<br>PTS system beta-glucoside-specific transporter |       | 0.99  |
| SpyM3_0404 |               | subunit IIABC                                                                           |       | 0.79  |
| SpyM3_0406 |               | hypothetical protein                                                                    | 0.69  | -0.69 |
| SpyM3_0407 |               | hypothetical protein                                                                    |       | -0.73 |
| SpyM3_0408 |               | hypothetical protein                                                                    |       | -1.14 |
| SpyM3_0411 |               | hypothetical protein                                                                    | 2.62  | -1.78 |
| SpyM3_0428 |               | glutathione peroxidase                                                                  | 0.72  |       |
| SpyM3_0429 | <i>pepF</i>   | oligoendopeptidase F                                                                    | 0.78  |       |
| SpyM3_0437 |               | hypothetical protein                                                                    | 0.59  |       |
| SpyM3_0458 |               | acetoin reductase                                                                       | 0.70  |       |
| SpyM3_0466 | <i>adcA</i>   | adhesion protein                                                                        |       | -0.78 |
| SpyM3_0467 |               | GntR family transcriptional regulator                                                   | -0.69 |       |
| SpyM3_0480 | <i>sagA</i>   | Streptolysin S, precursor peptide                                                       | -0.78 |       |
| SpyM3_0481 | <i>sagB</i>   | Streptolysin S, putative dehydrogenase                                                  | -0.90 | 0.77  |
| SpyM3_0482 | <i>sagC</i>   | Streptolysin S, putative cyclodehydratase                                               | -0.85 | 0.73  |
| SpyM3_0483 | <i>sagD</i>   | Streptolysin S, putative docking protein                                                | -0.91 | 0.77  |
| SpyM3_0484 | <i>sagE</i>   | Streptolysin S, putative immunity protein                                               | -0.68 | 0.74  |
| SpyM3_0485 | <i>sagF</i>   | Streptolysin S, putative membrane protein                                               | -0.66 | 0.75  |
| SpyM3_0486 | <i>sagG</i>   | Streptolysin S, putative ABC transporter                                                | -0.80 | 0.80  |
| SpyM3_0487 | <i>sagH</i>   | Streptolysin S, putative ABC transporter                                                | -0.72 | 0.84  |
| SpyM3_0488 | <i>sagI</i>   | Streptolysin S, putative ABC transporter                                                | -0.62 | 0.74  |
| SpyM3_0489 |               | hypothetical protein                                                                    | -1.35 |       |
| SpyM3_0513 | <i>rexB</i>   | ATP-dependent nuclease subunit B                                                        | 0.65  |       |
| SpyM3_0514 | <i>rexA</i>   | ATP-dependent exonuclease subunit A                                                     | 0.65  |       |
| SpyM3_0547 | <i>folC.2</i> | folyl-polyglutamate synthetase                                                          | 0.72  |       |
| SpyM3_0548 |               | hypothetical protein                                                                    | 0.74  | -0.68 |
| SpyM3_0563 |               | hypothetical protein                                                                    | -0.70 |       |
| SpyM3_0569 |               | surface antigen                                                                         |       | -0.61 |
| SpyM3_0570 |               | hypothetical protein                                                                    |       | -0.65 |
| SpyM3_0581 |               | peptidoglycan hydrolase                                                                 | 1.13  | -1.01 |
| SpyM3_0583 | <i>mac-1</i>  | IgG protease (Mac-1/IdeS)                                                               | 1.57  | -3.39 |

|            |              |                                                                 |       |       |
|------------|--------------|-----------------------------------------------------------------|-------|-------|
| SpyM3_0591 |              | 5'-nucleotidase                                                 | -1.15 | 1.16  |
| SpyM3_0602 | <i>dyr</i>   | dihydrofolate reductase                                         | 0.60  |       |
| SpyM3_0614 | <i>cpsY</i>  | transcriptional regulator                                       | 0.73  |       |
| SpyM3_0629 |              | hypothetical protein                                            | -1.59 |       |
| SpyM3_0630 |              | hypothetical protein                                            | -1.70 |       |
| SpyM3_0631 |              | hypothetical protein                                            | -0.97 |       |
| SpyM3_0633 |              | hypothetical protein                                            |       | -0.73 |
| SpyM3_0653 |              | ABC transporter substrate-binding protein                       | -1.37 |       |
| SpyM3_0655 |              | ABC transporter membrane-spanning permease                      | -1.37 |       |
| SpyM3_0656 |              | ABC transporter ATP-binding protein                             | -1.28 |       |
|            |              | PTS system mannose/fructose family transporter                  |       |       |
| SpyM3_0741 |              | subunit IIA                                                     | -0.82 |       |
|            |              | PTS system mannose/fructose transporter subunit IIB             |       |       |
| SpyM3_0742 |              | IIB                                                             | -0.68 |       |
| SpyM3_0749 | <i>uvrC</i>  | excinuclease ABC subunit C                                      | 0.78  | -0.71 |
| SpyM3_0780 |              | hypothetical protein                                            | 0.63  |       |
|            |              | oxidoreductase, short chain dehydrogenase/reductase             |       |       |
| SpyM3_0788 |              | oxidoreductase, short chain dehydrogenase/reductase             | 0.84  |       |
| SpyM3_0789 |              | oxidoreductase, short chain dehydrogenase/reductase             | 0.72  |       |
| SpyM3_0814 |              | hypothetical protein                                            | 0.77  |       |
| SpyM3_0816 |              | hypothetical protein                                            | 0.69  |       |
| SpyM3_0821 | <i>gid</i>   | tRNA (uracil-5-)-methyltransferase Gid                          | -0.94 |       |
| SpyM3_0822 |              | oxaloacetate decarboxylase                                      |       | 0.62  |
| SpyM3_0823 |              | hypothetical protein                                            |       | 0.76  |
|            |              | citrate lyase synthetase (citrate (pro-3S)-lyase ligase)        |       |       |
| SpyM3_0837 | <i>citC</i>  | ligase)                                                         | 0.92  | -0.92 |
| SpyM3_0838 |              | hypothetical protein                                            | 0.90  | -1.01 |
| SpyM3_0848 |              | hypothetical protein                                            | -0.67 | 0.76  |
| SpyM3_0849 | <i>pdxK</i>  | pyridoxamine kinase                                             | -0.81 | 0.80  |
| SpyM3_0870 |              | 16S rRNA m(2)G 1207 methyltransferase                           | -0.65 |       |
| SpyM3_0871 | <i>coaA</i>  | pantothenate kinase                                             | 0.93  |       |
| SpyM3_0873 | <i>ciaH</i>  | sensor histidine kinase protein                                 |       | 0.65  |
| SpyM3_0877 | <i>pstB</i>  | phosphate transporter ATP-binding protein                       |       | 0.70  |
| SpyM3_0878 | <i>pstB2</i> | phosphate transporter ATP-binding protein                       |       | 0.59  |
| SpyM3_0879 | <i>pstC</i>  | phosphate ABC transporter (permease protein)                    |       | 0.59  |
| SpyM3_0880 | <i>pstC2</i> | phosphate ABC transporter (permease protein)                    |       | 0.63  |
|            |              | phosphate ABC transporter periplasmic phosphate-binding protein |       |       |
| SpyM3_0881 | <i>pstS</i>  | phosphate-binding protein                                       |       | 0.62  |
| SpyM3_0902 |              | hypothetical protein                                            | -0.82 |       |
| SpyM3_0905 | <i>cfa</i>   | cAMP factor                                                     | -0.76 | 1.52  |
| SpyM3_0909 |              | hypothetical protein                                            | -0.65 |       |
| SpyM3_0979 |              | hypothetical protein                                            | -0.66 |       |
| SpyM3_0983 | <i>malE</i>  | maltose/maltodextrin-binding protein                            | 0.68  |       |

|            |               |                                                                                                                            |       |       |
|------------|---------------|----------------------------------------------------------------------------------------------------------------------------|-------|-------|
| SpyM3_0990 |               | esterase                                                                                                                   | 0.84  |       |
| SpyM3_0991 | <i>dltD</i>   | secreted protein DltD                                                                                                      | 0.78  |       |
| SpyM3_0992 | <i>dltC</i>   | D-alanine--poly(phosphoribitol) ligase subunit 2<br>dltB protein, D-alanine transfer from Dcp to<br>undecaprenol-phosphate | 0.74  |       |
| SpyM3_0993 | <i>dltB</i>   |                                                                                                                            | 0.84  |       |
| SpyM3_0994 | <i>dltA</i>   | D-alanine--poly(phosphoribitol) ligase subunit 1                                                                           | 0.74  |       |
| SpyM3_0997 | <i>glnP</i>   | glutamine ABC transporter glutamine-binding<br>protein/permease protein                                                    | 0.78  |       |
| SpyM3_0998 | <i>glnQ</i>   | ABC transporter ATP-binding protein -<br>glutamine<br>transport                                                            | 0.82  |       |
| SpyM3_1008 |               | hypothetical protein                                                                                                       | -0.98 |       |
| SpyM3_1019 |               | hypothetical protein                                                                                                       | 0.86  |       |
| SpyM3_1020 |               | hypothetical protein                                                                                                       |       | 1.38  |
| SpyM3_1032 | <i>grab</i>   | protein G-related alpha 2M-bindingprotein                                                                                  | -0.90 | 1.05  |
| SpyM3_1044 |               | peptidoglycan GlcNAc deacetylase                                                                                           |       | -0.63 |
| SpyM3_1048 | <i>nrdH</i>   | glutaredoxin-like protein                                                                                                  | 0.83  | -0.72 |
| SpyM3_1049 | <i>nrdE.1</i> | ribonucleotide-diphosphate reductase subunit<br>alpha                                                                      | 0.94  | -0.59 |
| SpyM3_1050 | <i>nrdF</i>   | ribonucleotide-diphosphate reductase subunit<br>beta                                                                       | 0.99  |       |
| SpyM3_1061 |               | oxalate:formate antiporter                                                                                                 | -0.98 |       |
| SpyM3_1068 |               | hypothetical protein                                                                                                       |       | 1.13  |
| SpyM3_1070 |               | hypothetical protein                                                                                                       | -0.89 | 1.19  |
| SpyM3_1071 | <i>sodM</i>   | superoxide dismutase                                                                                                       | -0.74 |       |
| SpyM3_1078 | <i>kup</i>    | cation/potassium uptake protein                                                                                            |       | 2.18  |
| SpyM3_1093 | <i>cadA</i>   | heavy metal/cadmium-transporting ATPase                                                                                    | -0.81 |       |
| SpyM3_1095 | <i>mf4</i>    | mitogenic factor - phage associated                                                                                        |       | -1.83 |
| SpyM3_1160 |               | amino acid ABC transporter ATP-binding protein                                                                             | -0.63 | 0.68  |
| SpyM3_1161 |               | amino acid ABC transporter (permease protein)                                                                              |       | 0.73  |
| SpyM3_1186 |               | ribose transport operon repressor                                                                                          |       | 0.65  |
| SpyM3_1187 |               | hypothetical protein                                                                                                       |       | 0.76  |
| SpyM3_1188 | <i>coaD</i>   | phosphopantetheine adenylyltransferase                                                                                     |       | 0.78  |
| SpyM3_1189 |               | type II DNA modification methyltransferase                                                                                 |       | 0.63  |
| SpyM3_1190 | <i>asnA</i>   | asparagine synthetase AsnA                                                                                                 | -1.35 | 1.61  |
| SpyM3_1191 | <i>arcC</i>   | carbamate kinase                                                                                                           |       | 0.87  |
| SpyM3_1192 |               | hypothetical protein                                                                                                       |       | 0.89  |
| SpyM3_1193 |               | arginine repressor                                                                                                         |       | 0.83  |
| SpyM3_1194 | <i>arcB</i>   | ornithine carbamoyltransferase                                                                                             |       | 0.99  |
| SpyM3_1195 |               | hypothetical protein                                                                                                       |       | 1.08  |
| SpyM3_1196 | <i>arcA</i>   | arginine deiminase                                                                                                         |       | 1.05  |
| SpyM3_1267 | <i>msrA.1</i> | bifunctional methionine sulfoxide reductase A/B<br>protein                                                                 | 0.83  |       |
| SpyM3_1268 |               | hypothetical protein                                                                                                       | 0.83  |       |
| SpyM3_1269 | <i>ccdA</i>   | cytochrome C-type biogenesis protein                                                                                       | 0.77  |       |
| SpyM3_1272 |               | hypothetical protein                                                                                                       | 0.93  |       |

|            |               |                                                     |       |       |
|------------|---------------|-----------------------------------------------------|-------|-------|
| SpyM3_1285 |               | beta-galactosidase                                  |       | 0.70  |
| SpyM3_1287 |               | two-component sensor histidine kinase               |       | 0.60  |
| SpyM3_1301 | <i>speA3</i>  | exotoxin type A precursor - phage associated        | 1.43  |       |
| SpyM3_1362 |               | hypothetical protein                                | -0.65 |       |
| SpyM3_1366 |               | two-component response regulator                    | 0.80  | -8.31 |
| SpyM3_1367 |               | two-component sensor histidine kinase               | 0.73  |       |
| SpyM3_1368 |               | hypothetical protein                                | -7.60 |       |
| SpyM3_1391 | <i>pepC</i>   | aminopeptidase C                                    | 0.72  | -0.65 |
| SpyM3_1409 | <i>sdn</i>    | streptodornase (Sdn) - phage associated             | -1.87 |       |
| SpyM3_1469 |               | hypothetical protein                                | -0.77 |       |
| SpyM3_1473 |               | hypothetical protein                                |       | -0.59 |
| SpyM3_1478 |               | hypothetical protein                                | 0.80  |       |
| SpyM3_1493 |               | esterase                                            | 1.06  | -1.89 |
| SpyM3_1509 |               | hypothetical protein                                | -1.25 |       |
| SpyM3_1527 | <i>fabH</i>   | 3-oxoacyl-ACP synthase                              | -0.73 |       |
| SpyM3_1528 |               | MarR family transcriptional regulator               | -0.61 |       |
| SpyM3_1557 | <i>cycD</i>   | ABC transporter ATP-binding protein                 |       | -0.74 |
| SpyM3_1558 | <i>fhuC.2</i> | ferrichrome transport ATP-binding protein           |       | -0.69 |
| SpyM3_1559 | <i>fhuG.2</i> | ferrichrome ABC transporter (permease)              |       | -0.60 |
| SpyM3_1566 | <i>pmi</i>    | mannose-6-phosphate isomerase                       | 1.05  | -0.99 |
| SpyM3_1583 |               | hypothetical protein                                | 0.89  | -1.27 |
| SpyM3_1584 | <i>mutY</i>   | A/G-specific adenine glycosylase                    |       | -0.83 |
| SpyM3_1599 |               | hypothetical protein                                | -0.63 |       |
| SpyM3_1614 |               | GntR family transcriptional regulator               | 0.70  |       |
| SpyM3_1625 | <i>lppC</i>   | acid phosphatase                                    |       | 0.63  |
| SpyM3_1645 | <i>salR</i>   | response regulator of salavaricin regulon           | 0.59  |       |
| SpyM3_1646 | <i>salk</i>   | two-component sensor histidine kinase               | 0.62  |       |
| SpyM3_1655 | <i>lacF</i>   | PTS system lactose-specific transporter subunit IIA | -0.62 |       |
| SpyM3_1656 | <i>lacD.2</i> | tagatose 1,6-diphosphate aldolase                   | -0.66 |       |
| SpyM3_1657 | <i>lacC.2</i> | tagatose-6-phosphate kinase                         | -0.64 |       |
| SpyM3_1666 |               | hypothetical protein                                | -0.59 |       |
| SpyM3_1687 | <i>polC</i>   | DNA polymerase III PolC                             | 0.59  |       |
| SpyM3_1698 | <i>ska</i>    | streptokinase A precursor                           | 1.09  | -2.91 |
| SpyM3_1699 |               | hypothetical protein                                | 1.21  |       |
| SpyM3_1712 | <i>pabP</i>   | para-aminobenzoate synthetase                       | 0.68  |       |
| SpyM3_1714 |               | recombination factor protein RarA                   | 0.63  |       |
| SpyM3_1718 | <i>dppA</i>   | surface lipoprotein DppA                            | 0.76  | -1.22 |
| SpyM3_1719 | <i>dppB</i>   | dipeptide ABC transporter permease protein          | 0.93  | -0.96 |
| SpyM3_1720 | <i>dppC</i>   | dipeptide ABC transporter permease protein          | 1.00  | -0.80 |
| SpyM3_1721 | <i>dppD</i>   | dipeptide ABC transporter ATP-binding protein       | 0.97  | -1.01 |
| SpyM3_1722 | <i>dppE</i>   | dipeptide ABC transporter ATP-binding protein       | 1.02  | -1.12 |
| SpyM3_1723 |               | hypothetical protein                                |       | -1.49 |

|            |              |                                           |       |       |
|------------|--------------|-------------------------------------------|-------|-------|
| SpyM3_1726 | <i>scpA</i>  | C5A peptidase precursor                   | 0.88  | -2.63 |
| SpyM3_1727 | <i>emm3</i>  | antiphagocytic M protein, type 3          |       | -0.88 |
| SpyM3_1728 | <i>mga</i>   | M protein trans-acting positive regulator | 0.70  | -1.11 |
| SpyM3_1730 |              | hypothetical protein                      |       | 0.70  |
| SpyM3_1731 | <i>isp.1</i> | hypothetical protein                      |       | 0.64  |
| SpyM3_1732 |              | histidine kinase                          |       | 0.69  |
| SpyM3_1733 |              | two-component response regulator          |       | 0.70  |
| SpyM3_1734 |              | ABC transporter permease                  |       | 1.41  |
| SpyM3_1735 |              | ABC transporter ATP-binding protein       |       | 1.87  |
| SpyM3_1736 |              | ATP-binding cassette transporter protein  |       | 2.09  |
| SpyM3_1737 |              | hypothetical protein                      |       | 2.42  |
| SpyM3_1738 |              | hypothetical protein                      | 0.88  | -0.79 |
| SpyM3_1739 |              | hypothetical protein                      | 1.01  | -1.97 |
| SpyM3_1740 | <i>prsA</i>  | foldase protein PrsA                      | -1.19 | 1.26  |
| SpyM3_1741 |              | hypothetical protein                      |       | 8.67  |
| SpyM3_1742 | <i>speB</i>  | pyrogenic exotoxin B                      |       | 8.75  |
| SpyM3_1743 |              | hypothetical protein                      |       | 8.15  |
| SpyM3_1744 | <i>ropB</i>  | transcription regulator                   | -0.82 | 1.25  |
| SpyM3_1745 | <i>mf</i>    | mitogenic factor 25K precursor            | -0.84 |       |
| SpyM3_1747 | <i>gldA</i>  | glycerol dehydrogenase                    | 0.67  |       |
| SpyM3_1748 | <i>mipB</i>  | fructose-6-phosphate aldolase             | 0.70  |       |
| SpyM3_1749 | <i>pflD</i>  | pyruvate formate-lyase                    | 0.65  |       |
| SpyM3_1758 | <i>pbp2A</i> | penicillin-binding protein 2a             | 0.76  |       |
| SpyM3_1759 |              | translation initiation inhibitor          | 0.79  | -2.09 |
| SpyM3_1784 | <i>pepO</i>  | endopeptidase O                           | 1.08  | -0.97 |
| SpyM3_1785 | <i>dexS</i>  | dextran glucosidase                       |       | 0.72  |
| SpyM3_1786 |              | PTS system transporter protein II         |       | 0.66  |
| SpyM3_1799 | <i>spxA</i>  | transcriptional regulator Spx             | 2.29  | -3.59 |
| SpyM3_1810 |              | hypothetical protein                      | 0.79  | -0.85 |
| SpyM3_1826 |              | hypothetical protein                      | -0.65 |       |
| SpyM3_1841 | <i>sdhB</i>  | L-serine dehydratase beta subunit         | 0.98  |       |
| SpyM3_1842 | <i>sdhA</i>  | L-serine dehydratase alpha subunit        | 0.92  |       |
| SpyM3_1843 |              | hypothetical protein                      | -1.06 |       |
| SpyM3_1849 |              | hypothetical protein                      | 0.77  | -0.80 |
| SpyM3_1850 |              | hypothetical protein                      | 0.69  | -0.80 |
| SpyM3_1851 | <i>hasA</i>  | hyaluronan synthase                       | 0.79  | -3.96 |
| SpyM3_1852 | <i>hasB</i>  | UDP-glucose 6-dehydrogenase               | 0.75  | -3.98 |
| SpyM3_1853 | <i>hasC</i>  | UDP-glucose pyrophosphorylase             | 0.75  | -3.82 |
| SpyM3_1857 | <i>guaB</i>  | inosine 5'-monophosphate dehydrogenase    | -0.71 |       |
| SpyM3_1858 | <i>trsA</i>  | tryptophanyl-tRNA synthetase              | -0.92 |       |
| SpyM3_1859 |              | hypothetical protein                      | -0.79 |       |
| SpyM3_1864 | <i>degP</i>  | serine protease                           |       | 0.69  |

<sup>a</sup> Locus tag derived from MGAS315 (AE014074.1).

<sup>b</sup> Predicted protein product as annotated in MGAS315 genome (AE014074.1).

<sup>c</sup> Log<sub>2</sub> fold-change in mutant relative to wild-type (MGAS10870). Shown are only those genes that met criteria defined for significant differential gene expression as described in Methods.

**Table S3.** Bacterial strains used in this study.

| <b>Strain</b>              | <b>Description</b>                                                                                                                                  | <b>Source/Reference</b> |
|----------------------------|-----------------------------------------------------------------------------------------------------------------------------------------------------|-------------------------|
| NEB5alpha                  | <i>E. coli</i> cloning strain                                                                                                                       | New England BioLabs     |
| MGAS10870                  | Wild-type serotype M3 group A <i>Streptococcus</i>                                                                                                  | (2)                     |
| $\Delta liaF$              | MGAS10870 with in-frame, unmarked deletion in <i>liaF</i>                                                                                           | (3)                     |
| $\Delta liaR$              | MGAS10870 with in-frame deletion of <i>liaR</i> using <i>aad9</i> ( $\Delta liaR::aad9$ )                                                           | (3)                     |
| $\Delta spxA2$             | MGAS10870 with in-frame deletion of <i>spxA2</i> using <i>aad9</i> ( $\Delta spxA2::aad9$ )                                                         | This study              |
| $\Delta ropB$              | MGAS10870 with in-frame deletion of <i>ropB</i> using <i>aph</i> ( $\Delta ropB::aph$ )                                                             | (3)                     |
| $\Delta clpX$              | MGAS10870 with in-frame deletion of <i>clpX</i> using <i>aad9</i> ( $\Delta clpX::aad9$ )                                                           | This study              |
| $\Delta liaR/\Delta ropB$  | MGAS10870 with in-frame deletion of both <i>liaR</i> ( $\Delta liaR::aad9$ ) and <i>ropB</i> ( $\Delta ropB::aph$ )                                 | This study              |
| $\Delta liaF/\Delta spxA2$ | MGAS10870 with in-frame, unmarked deletion of <i>liaF</i> and in-frame deletion of <i>spxA2</i> ( $\Delta spxA2::aad9$ )                            | This study              |
| $\Delta liaR/\Delta spxA2$ | MGAS10870 with in-frame deletion of <i>liaR</i> using <i>aad9</i> ( $\Delta liaR::aad9$ ) and <i>spxA2</i> using <i>aph</i> ( $\Delta spxA2::aph$ ) | This study              |

**Table S4.** Plasmids, primers, and probes used in this study.

| <b>Primer</b> | <b>Sequence (5'-3')</b>                  | <b>Use</b>                                            |
|---------------|------------------------------------------|-------------------------------------------------------|
| tufA-F        | CAACTCGTCACTATGCGCACAT                   | qRT PCR; Forward primer for <i>tufA</i>               |
| tufA-R        | GAGCGGCACCAGTGATCAT                      | qRT PCR; Reverse primer for <i>tufA</i>               |
| tufA-P        | [6FAM]CTCCAGGACACGCGGACTACGTTAAAA[BHQ1]  | qRT PCR; Probe for <i>tufA</i>                        |
| hasA-F        | ACCGTTCCTTGCAATAAAGG                     | qRT PCR; Forward primer for <i>hasA</i>               |
| hasA-R        | CGTCAGCGTCAGATCTTTCAA                    | qRT PCR; Reverse primer for <i>hasA</i>               |
| hasA-P        | [6FAM]CGCCATGCTCAAGCGTGGGC[BHQ1]         | qRT PCR; Probe for <i>hasA</i>                        |
| mac1-F        | ATCGAACACCAGTGAAGCAT                     | qRT PCR; Forward primer for <i>mac1</i>               |
| mac1-R        | ACATTCAATGGAAAAGACGATCTTCT               | qRT PCR; Reverse primer for <i>mac1</i>               |
| mac1-P        | [6FAM]TTCCTGGTGTGGCAGCCCC[BHQ1]          | qRT PCR; Probe for <i>mac1</i>                        |
| spxA2-F       | AAGGATGCGCGGGTTATCTT                     | qRT PCR; Forward primer for <i>spxA2</i>              |
| spxA2-R       | ATGCCAAAGCTCTCGATTGC                     | qRT PCR; Reverse primer for <i>spxA2</i>              |
| spxA2-P       | [6FAM]TCAAATCAATAACCTCACTAACACTT[BHQ1]   | qRT PCR; Probe for <i>spxA2</i>                       |
| ska-F         | ACTGATCGAAACGGCAAGGT                     | qRT PCR; Forward primer for <i>ska</i>                |
| ska-R         | TTCTTGACAGGTTGGGTGC                      | qRT PCR; Reverse primer for <i>ska</i>                |
| ska-P         | [6FAM]TGCTGACAAAGATGGTTCGGT[BHQ1]        | qRT PCR; Probe for <i>ska</i>                         |
| grab-F        | GCATCAGTATTAGTCGGTTCAACAGT               | qRT PCR; Forward primer for <i>grab</i>               |
| grab-R        | GGTCCGCCATTTGGAATAA                      | qRT PCR; Reverse primer for <i>grab</i>               |
| grab-P        | [6FAM]TGTTGACTCACCTATCGAACAGCCTCGA[BHQ1] | qRT PCR; Probe for <i>grab</i>                        |
| tee3-F        | AGCGTGACACTCAAGTTCCA                     | qRT PCR; Forward primer for <i>tee3</i>               |
| tee3-R        | TCCACCAATAGCCACAATGCT                    | qRT PCR; Reverse primer for <i>tee3</i>               |
| tee3-P        | [6FAM]ACCCTTGCTCCATTTGCAGT[BHQ1]         | qRT PCR; Probe for <i>tee3</i>                        |
| speB-F        | TGCCTACAACAGCACTTTGG                     | qRT PCR; Forward primer for <i>speB</i>               |
| speB-R        | GTGGAGTCTCTGACGGCTTCT                    | qRT PCR; Reverse primer for <i>speB</i>               |
| speB-P        | [6FAM]GCCTGCGCCGCCACCAGTA[BHQ1]          | qRT PCR; Probe for <i>speB</i>                        |
| spxA2-A-F     | AGCAGAACTTAGGTTAACTGAT                   | ChIP qRT PCR, Forward primer for <i>spxA2</i> motif A |
| spxA2-A-R     | TTATCTTGGTAAAAATAAGGTTTT                 | ChIP qRT PCR, Forward primer for <i>spxA2</i> motif A |
| spxA2-A-P     | [6FAM]ACTAATAATTCAAGGGAATACAGGTGA [BHQ1] | ChIP qRT PCR, probe for <i>spxA2</i> motif A          |
| spxA2-B-F     | GGTGAAAAACCTTATTTACCAAGA                 | ChIP qRT PCR, Forward primer for <i>spxA2</i> motif B |
| spxA2-B-R     | TGCTGACTCACTTTCTATTTCTGTG                | ChIP qRT PCR, Forward primer for <i>spxA2</i> motif B |

|           |                                                                   |                                                                                         |
|-----------|-------------------------------------------------------------------|-----------------------------------------------------------------------------------------|
| spxA2-B-P | [6FAM]AAGAAACTGTGCTACAATAAAGCT[BHQ1]                              | ChIP qRT PCR, probe for spxA2 motif B                                                   |
| MSP378    | GTACCATGCGCAGGATAAAACAC                                           | Pair with MSP381 to generate 5' flanking region for <i>clpX::aad9</i> gene replacement  |
| MSP381    | CTTTATTAATTTGTTTCGTATGTATTCAATTCTTATAATTCTCTTA<br>CTTTCTCTTATC    | Pair with MSP378 to generate 5' flanking region for <i>clpX::aad9</i> gene replacement  |
| MSP379    | CTATAAAAGTATCAGATTTGTC                                            | Pair with MSP382 to generate 3' flanking region for <i>clpX::aad9</i> gene replacement  |
| MSP382    | CTATTTAAATAACAGATTAATAAAATTATAAGGAGAAATAATGG<br>CTGAAGAACAAG      | Pair with MSP379 to generate 3' flanking region for <i>clpX::aad9</i> gene replacement  |
| MSP380    | GATAAGAGAAAGTAAGAGAATTATAAGAATTGAATACATACGA<br>ACAAATTAATAAAG     | Pair with MSP383 to generate <i>aad9</i> gene replacement<br><i>clpX::aad9</i>          |
| MSP383    | CTTGTTCCTTCAGCCATTATTTCTCCTTATAATTTTTTAATCTGT<br>TATTTAAATAG      | Pair with MSP380 to generate <i>aad9</i> gene replacement<br><i>clpX::aad9</i>          |
| 3122F     | AAGCCAAGAGGATCACTAAT                                              | Pair with MSP337 to generate 5' flanking region for <i>spxA2::aad9</i> gene replacement |
| MSP337    | ACTATTTAAATAACAGATTAATAAAATTATAAAAGCTCTTGTAG<br>AGCTTTTTTTAAATACC | Pair with 3122F to generate 5' flanking region for <i>spxA2::aad9</i> gene replacement  |
| MSP336    | GGTATTTAAAAAAGCTCTACAAGAGCTTTTATAATTTTTTTAA<br>TCTGTTATTTAAATAGT  | Pair with MSP339 to generate <i>aad9</i> gene replacement<br><i>spxA2::aad9</i>         |
| MSP339    | CTATCACGAAATAGAAAGTGAGTCAGCAACTTGAATACATACG<br>AACAAATTAATAAAG    | Pair with MSP336 to generate <i>aad9</i> gene replacement<br><i>spxA2::aad9</i>         |
| 3123R     | CGGAGCGACCTTGTTTTAA                                               | Pair with MSP338 to generate 3' flanking region for <i>spxA2::aad9</i> gene replacement |
| MSP338    | CTTTATTAATTTGTTTCGTATGTATTCAAGTTGCTGACTCACTTT<br>CTATTTTCGTGATAG  | Pair with 3123R to generate 3' flanking region for <i>spxA2::aad9</i> gene replacement  |

## REFERENCES

1. **CLSI.** 2018. Performance Standards for Antimicrobial Disk Susceptibility Tests, 13th ed. Clinical Laboratory Standards Institute, Wayne, PA.
2. **Beres, S. B., R. K. Carroll, P. R. Shea, I. Sitkiewicz, J. C. Martinez-Gutierrez, D. E. Low, A. McGeer, B. M. Willey, K. Green, G. J. Tyrrell, T. D. Goldman, M. Feldgarden, B. W. Birren, Y. Fofanov, J. Boos, W. D. Wheaton, C. Honisch, and J. M. Musser.** 2010. Molecular complexity of successive bacterial epidemics deconvoluted by comparative pathogenomics. *Proc Natl Acad Sci U S A.* **107**:4371-6.
3. **Lin, Y., M. A. Sanson, L. A. Vega, B. Shah, S. Regmi, M. B. Cubria, and A. R. Flores.** 2020. ExPortal and the LiaFSR Regulatory System Coordinate the Response to Cell Membrane Stress in *Streptococcus pyogenes*. *mBio.* **11**.
